# Supplementary material for: Evaluation of the Gold Coast Integrated Care for patients with chronic disease or high risk of hospitalisation through a non-randomised controlled clinical trial: a pilot study protocol
Source: PubMed Central journal article supplement — BMJ Open. 2017 Jul 2;7(6):e016776. doi: 10.1136/bmjopen-2017-016776 (PMC5734577; doi:10.1136/bmjopen-2017-016776), 2017-07-02
Supplement: bmjopen-2017-016776supp002.pdf [file bmjopen-2017-016776supp002.pdf]

# Please complete this form and return

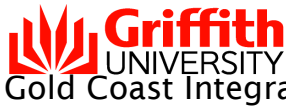

## Gold Coast Health

Gold Coast Integrated Care Program Evaluation: Consent form

# B

### **PARTICIPANT CONSENT FORM**

I have read and understood the information sheet on the evaluation project. I have had the opportunity to ask any questions I need to understand the project and agree to participate, and received satisfactory answers to my questions. I understand that taking part in the consultations is voluntary and that I can withdraw at any time without disadvantaging me or affecting my relationship with the Gold Coast Hospital and Health Service, health staff and or my GP (refer to *Revocation of Consent* form). I understand that if I decide to withdraw for any reason, I will be withdrawing only from the research, and will still be provided care for my condition through the Gold Coast Hospital and Health Service. I understand that individuals' health information and contributions will not be identified in any report or publication. I understand that if I have any questions relating to the collection of my health information, surveys, and/or interviews/focus groups I may contact Lauren Ward at [l.ward@griffith.edu.au](mailto:l.ward@griffith.edu.au) or 1300 004 242. Alternatively I can contact the Research Ethics Coordinator at Gold Coast Hospital and Health Service on (07) 5687 3879 or email [GCHEthics@health.qld.gov.au](mailto:GCHEthics@health.qld.gov.au).

**I, \_\_\_\_\_ agree to take part in this study on health condition management.**

**Signature \_\_\_\_\_ Date \_\_\_\_\_**

People often move address and sometimes it is difficult for the study researchers to make contact again. In this case the following friend or relative of mine who lives at a different location can be contacted:

**Name/relationship/phone: \_\_\_\_\_**

Signed on behalf of participant by (full name and signature) \_\_\_\_\_

Date: \_\_\_\_\_ Circle where appropriate: *Power of attorney / Guardianship order / Statutory Health Attorney*. Please also attach supporting evidence.

|  |  |  |  |  |  |
|--|--|--|--|--|--|
|  |  |  |  |  |  |
|--|--|--|--|--|--|
