# Supplementary material for: Evaluation of the Gold Coast Integrated Care for patients with chronic disease or high risk of hospitalisation through a non-randomised controlled clinical trial: a pilot study protocol
Source: PubMed Central journal article supplement — BMJ Open. 2017 Jul 2;7(6):e016776. doi: 10.1136/bmjopen-2017-016776 (PMC5734577; doi:10.1136/bmjopen-2017-016776), 2017-07-02
Supplement: bmjopen-2017-016776supp003.pdf [file bmjopen-2017-016776supp003.pdf]

**Please complete this form and return**

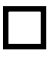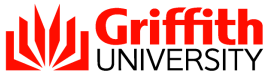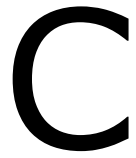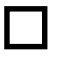

**PARTICIPANT CONSENT FORM**

Consent to release of Medicare and/or Pharmaceutical Benefits Scheme (PBS) claims information for the purposes of the Gold Coast Integrated Care Program Evaluation Study.

**Important information**

Complete this form to request the release of personal Medicare claims information and/or PBS claims information to the Gold Coast Integrated Care Program Evaluation Study.

Any changes to this form must be initialled by the signatory. Incomplete forms may result in the study not being provided with your information.

By signing this form, I acknowledge that I have been fully informed and have been provided with information about this study. I have been given an opportunity to ask questions and understand the possibilities of disclosures of my personal information.

**PARTICIPANT DETAILS**

1. Mr  Mrs  Miss  Ms  Other

Family name: \_\_\_\_\_ First given name: \_\_\_\_\_

Other given name (s): \_\_\_\_\_

Date of birth (DD/MM/YYYY): 

|  |  |  |  |   |   |  |  |
|--|--|--|--|---|---|--|--|
|  |  |  |  | 1 | 9 |  |  |
|--|--|--|--|---|---|--|--|

2. Medicare card number: 

|  |  |  |  |  |  |  |  |  |  |  |  |  |
|--|--|--|--|--|--|--|--|--|--|--|--|--|
|  |  |  |  |  |  |  |  |  |  |  |  |  |
|--|--|--|--|--|--|--|--|--|--|--|--|--|

Individual Reference Number: 

|  |
|--|
|  |
|--|

3. Permanent address:

\_\_\_\_\_  
Postal address (if different to above):  
\_\_\_\_\_

|  |  |  |  |  |  |  |  |
|--|--|--|--|--|--|--|--|
|  |  |  |  |  |  |  |  |
|--|--|--|--|--|--|--|--|

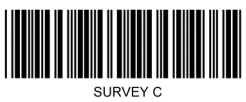

SURVEY C

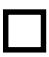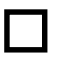

# Please complete this form and return

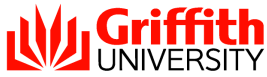

## Gold Coast Health

Gold Coast Integrated Care Program Evaluation: MBS/PBS consent

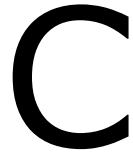

### AUTHORISATION

4. I authorise the Department of Human Services to provide my:

- Medicare claims history, OR
- PBS claims history, OR
- Medicare & PBS claims history

for the period\* 01/01/2014 to 31/12/2024 to the Gold Coast Integrated Care Program Evaluation Study.

\*Note: The Department of Human Services can only extract 4.5 years of data (prior to the date of extraction), therefore the consent period above may result in multiple extractions.

### DECLARATION

I declare that the information on this form is true and correct.

5. Signed: \_\_\_\_\_ (participant's signature)

Dated: \_\_\_\_\_ OR

6. Signed on behalf of participant by \_\_\_\_\_ (full name)

\_\_\_\_\_ (signature)

Dated: \_\_\_\_\_

- Parent (where the participant is under the age of 14 years old\*)
- Legal guardian\*\* (where the participant is under 14 years old\*)
- Power of attorney\*\*
- Guardianship order\*\*

\* Once a young person has turned 14 years old they must consent to their own information being released.

\*\* Please attach supporting evidence

## APP 5 – PRIVACY NOTICE

Your personal information is protected by law, including the Privacy Act 1988, and is collected by the Australian Government Department of Human Services. The collection of your personal information by the department is necessary for administering requests for statistical and other data.

Your information may be used by the department or given to other parties for the purposes of research, investigation or where you have agreed or it is required or authorised by law.

You can get more information about the way in which the Department of Human Services will manage your personal information, including our privacy policy at [humanservices.gov.au/privacy](http://humanservices.gov.au/privacy) or by requesting a copy from the department.

**Power of attorney** – A power of attorney is a document that appoints a person to act on behalf of another person who grants that power. In particular, an enduring power of attorney allows the appointed person to act on behalf of another person even when that person has become mentally incapacitated. The powers under a power of attorney may be unlimited or limited to specific acts.

**Guardianship order** – A Guardianship order is an order made by a Guardianship Board/Tribunal that appoints a guardian to make decisions for another person. A Guardianship order may be expressed broadly or limited to particular aspects of the care of another person.

### A sample of the information that may be included in your Medicare claims history:

| Date of service | Date of Processing | Item number | Item description     | Provider charge | Schedule Fee | Benefit paid | Patient out of pocket | Bill type |
|-----------------|--------------------|-------------|----------------------|-----------------|--------------|--------------|-----------------------|-----------|
| 20/04/09        | 03/05/09           | 00023       | Level B consultation | \$38.30         | \$34.30      | \$34.30      | \$4.00                | Cash      |
| 22/06/09        | 23/06/09           | 11700       | ECG                  | \$29.50         | \$29.50      | \$29.50      |                       | Bulk Bill |

| Scrambled ordering Provider number* | Scrambled rendering Provider number* | Date of referral | Rendering Provider postcode | Ordering Provider postcode | Hospital indicator | Item category |
|-------------------------------------|--------------------------------------|------------------|-----------------------------|----------------------------|--------------------|---------------|
|                                     | 999999A                              |                  | 2300                        |                            | N                  | 1             |
| 999999A                             | 999999A                              | 20/04/09         | 2300                        | 2302                       | N                  | 2             |

\* Scrambled Provider number refers to a unique scrambled provider number identifying the doctor who provided/referred the service. Generally, each individual provider number will be scrambled and the identity of that provider will not be disclosed.

### A sample of the information that may be included in your PBS claims history:

| Date of supply | Date of prescribing | PBS item code | Item description      | Patient category      | Patient contribution (this includes under copayment amounts**) | Net Benefit (this includes under copayment amounts**) | Scrambled Prescriber number* | Pharmacy postcode |
|----------------|---------------------|---------------|-----------------------|-----------------------|----------------------------------------------------------------|-------------------------------------------------------|------------------------------|-------------------|
| 06/03/09       | 01/03/09            | 03133X        | Oxazepam Tablet 30 mg | Concessional Ordinary | \$5.30                                                         | \$25.55                                               | 9999999                      | 2560              |
| 04/07/09       | 28/05/09            | 03161J        | Diazepam Tablet 2 mg  | General Ordinary      | \$30.85                                                        |                                                       | 9999999                      | 2530              |

| Form Category | ATC Code   | ATC Name |
|---------------|------------|----------|
| Original      | N05 B A 04 | Oxazepam |
| Repeat        | N05 B A 01 | Diazepam |

\* Scrambled Prescriber number refers to a unique scrambled prescriber number identifying the doctor who prescribed the prescription. Generally, each individual prescriber number will be scrambled and the identity of that prescriber will not be disclosed.

\*\* Under co-payments can now be provided for data after 1 June 2012
