# Supplementary material for: Evaluation of the Gold Coast Integrated Care for patients with chronic disease or high risk of hospitalisation through a non-randomised controlled clinical trial: a pilot study protocol
Source: PubMed Central journal article supplement — BMJ Open. 2017 Jul 2;7(6):e016776. doi: 10.1136/bmjopen-2017-016776 (PMC5734577; doi:10.1136/bmjopen-2017-016776), 2017-07-02
Supplement: bmjopen-2017-016776supp004.pdf [file bmjopen-2017-016776supp004.pdf]

## SUPPLEMENT D - Data collection and sampling plan

| Objective                                                                        | Research question                                                                                            | Outcome measure                                                                                                                           | Data source                                                          | Schedule                             |                              |
|----------------------------------------------------------------------------------|--------------------------------------------------------------------------------------------------------------|-------------------------------------------------------------------------------------------------------------------------------------------|----------------------------------------------------------------------|--------------------------------------|------------------------------|
| Reduced overall costs to the GCHHS for high risk complex and comorbid conditions | 1. Does the program reduce overall costs of delivering health care services for patients with complex needs? | MBS costs:<br>- benefit paid<br>- patient contribution                                                                                    | Commonwealth Government, Department of Human Services                | data range: 01/01/2014 to 31/12/2018 |                              |
|                                                                                  |                                                                                                              | PBS costs (for each class of medication):<br>- patient contribution<br>- net benefit                                                      |                                                                      |                                      |                              |
|                                                                                  | 2. What is the cost effectiveness of the GCIC program?                                                       | Emergency Department costs per episode                                                                                                    | GCHHS                                                                | 3 years retrospective and 12 monthly |                              |
|                                                                                  |                                                                                                              | Inpatient costs per episode (based on AR-DRGs and costed using the National Efficient Price weights)                                      |                                                                      |                                      |                              |
|                                                                                  |                                                                                                              | Outpatient visit costs (using the Tier 2 weights from the National Efficient Price)                                                       |                                                                      |                                      |                              |
|                                                                                  |                                                                                                              | Investigation costs incl. radiology and pathology                                                                                         |                                                                      |                                      |                              |
|                                                                                  |                                                                                                              | Quality of life (AQOL-4D)                                                                                                                 | holistic assessment                                                  | baseline and 12 monthly              |                              |
|                                                                                  | GCIC staff costs                                                                                             | GCIC human resources                                                                                                                      | annually                                                             |                                      |                              |
| Improved health outcomes                                                         | 1. Does the program improve health outcomes for high risk patients with complex needs?                       | Quality of life (AQOL-4D)                                                                                                                 | patient questionnaire                                                | baseline and 12 monthly              |                              |
|                                                                                  |                                                                                                              | Mortality                                                                                                                                 | GCIC/GCHHS                                                           | annually                             |                              |
|                                                                                  |                                                                                                              | Capability/wellness (ICECAP-O-5)                                                                                                          | patient questionnaire                                                | baseline and 12 monthly              |                              |
|                                                                                  |                                                                                                              | Social support (LSNS-6)                                                                                                                   |                                                                      |                                      |                              |
|                                                                                  |                                                                                                              | Number of falls                                                                                                                           |                                                                      |                                      |                              |
|                                                                                  | 2. What is the relationship between patient outcomes and clinical and demographic characteristics?           | Blood pressure, Body Mass Index, smoking status and history, condition specific indicators (e.g. HbA1c, lipids) (intervention group only) | holistic assessment, GPr and GCIC data (Shared Care Record, Pencent) | baseline and 12 monthly              |                              |
|                                                                                  |                                                                                                              | Does the program change the proportion of costs shared by the                                                                             | Number of Emergency Department attendances                           | GCHHS                                | 3 years retrospective and 12 |
|                                                                                  |                                                                                                              |                                                                                                                                           | Number of inpatient admissions (unplanned / emergency)               |                                      |                              |
|                                                                                  | Number of GP visits                                                                                          | GPr data (Pencent)                                                                                                                        |                                                                      |                                      |                              |

| Objective                                                         | Research question                                                                                          | Outcome measure                                                                                                                                                                                             | Data source                                           | Schedule                                                                  |
|-------------------------------------------------------------------|------------------------------------------------------------------------------------------------------------|-------------------------------------------------------------------------------------------------------------------------------------------------------------------------------------------------------------|-------------------------------------------------------|---------------------------------------------------------------------------|
|                                                                   | primary and secondary care sectors?                                                                        | Number of outpatient visits by specialty (new and review)                                                                                                                                                   | GCHHS                                                 | monthly                                                                   |
|                                                                   |                                                                                                            | Analysis of MBS/PBS data according to primary and secondary care                                                                                                                                            | Commonwealth Government, Department of Human Services | data range: 01/01/2014 to 31/12/2018                                      |
| Reduced number of potentially avoidable hospital admissions       | Does the program reduce potentially avoidable hospital admissions and or presentations and length of stay? | Number of Emergency Department attendances                                                                                                                                                                  | GCHHS                                                 | 3 years retrospective and 12 monthly                                      |
|                                                                   |                                                                                                            | Number of inpatient admissions (unplanned / emergency)                                                                                                                                                      |                                                       |                                                                           |
|                                                                   |                                                                                                            | Hospital inpatient length of stay                                                                                                                                                                           |                                                       |                                                                           |
|                                                                   |                                                                                                            | Number of outpatient visits by specialty (new and review)                                                                                                                                                   |                                                       |                                                                           |
|                                                                   |                                                                                                            | Number and type of investigations e.g. radiology, pathology                                                                                                                                                 |                                                       |                                                                           |
| Improved patient satisfaction                                     | Does the program improve patient experiences and satisfaction with care?                                   | Patient satisfaction (SAPS-7)                                                                                                                                                                               | questionnaire                                         | baseline and 12 monthly                                                   |
|                                                                   |                                                                                                            | Assessment of chronic illness care (PACIC-20)                                                                                                                                                               |                                                       |                                                                           |
|                                                                   |                                                                                                            | Specifically designed open-ended questions (incl. acceptability of services) (qualitative method)                                                                                                           | Focus Groups                                          | Feb/March 2016, June 2017 (intervention group); June 2017 (control group) |
| Improved staff satisfaction                                       | Does the program improve clinician experience and satisfaction?                                            | Specifically designed GPr staff questions (incl. referral processes, communication with service providers) (intervention group only)                                                                        | surveys (GPr nurse, GP, Practice Manager)             | Sept 2015, June 2017, Dec 2018                                            |
|                                                                   |                                                                                                            | Specifically designed open ended questions (incl. barriers & enablers to implementation, change management strategies, acceptability of program, confidence) (qualitative method) (intervention group only) | Focus Groups                                          | Sept 2015, June 2017, Dec 2018                                            |
| To provide projected estimates of health service utilisation from | What are the projected changes in future numbers of admissions, emergency attendances, GP visits and other | Population projections:<br>- age<br>- gender<br>- region                                                                                                                                                    | Australian Bureau of Statistics population trends     | data range: 01/01/2014 to 31/12/2018                                      |
|                                                                   |                                                                                                            | Differences in rates of healthcare utilisation between intervention                                                                                                                                         | GCIC                                                  |                                                                           |

| Objective                                                                                                                                                                     | Research question                                                                                                                                                                                         | Outcome measure                                                                                                                                          | Data source                                                                                                                                                            | Schedule                                   |
|-------------------------------------------------------------------------------------------------------------------------------------------------------------------------------|-----------------------------------------------------------------------------------------------------------------------------------------------------------------------------------------------------------|----------------------------------------------------------------------------------------------------------------------------------------------------------|------------------------------------------------------------------------------------------------------------------------------------------------------------------------|--------------------------------------------|
| generalising the program for the Gold Coast and other metropolitan areas of Australia                                                                                         | healthcare utilisation based on generalising the GCIC program for the Gold Coast and other metropolitan areas of Australia for patients with complex needs over the five years from the end of the pilot? | and control groups:<br>- Emergency Department attendances<br>- inpatient admissions<br>- GP visits<br>- outpatient attendances                           |                                                                                                                                                                        |                                            |
| To provide financial estimates for health budgets from generalising the program for the Gold Coast and other metropolitan areas of Australia                                  | What are the forward estimates for the GCIC program for the Gold Coast, and expected costs of adapting the GCIC program to other metropolitan areas of Australia for patients with complex needs?         | Population projections:<br>- age<br>- gender<br>- region                                                                                                 | Australian Bureau of Statistics population trends                                                                                                                      | data range:<br>01/01/2014 to<br>31/12/2018 |
| To estimate any changes in the mix of the healthcare workforce required to provide integrated care should it be rolled out across the Gold Coast, Queensland and/or Australia | What are the additional types of staff requirements (including training needs) and staff displaced from generalising the intervention across the Gold Coast and other metropolitan areas of Australia?    | - potential target population size<br>- staffing ratios per participant<br>- changes in healthcare utilisation across the different sectors and services | - Australian Bureau of Statistics population trends<br>- GCIC<br>- intervention staff needs assessment<br>- estimates of changes in hospital and primary care services | data range:<br>01/01/2014 to<br>31/12/2018 |

| Objective                                                  | Research question                                                                          | Outcome measure                                                                                                                                                                                                                                                                                                                                                                                                                                                                                                                                                                                                                                                                                                                                                                                                                                                                                                                                                                                                                                                                                                                                                                                                                                                                                                                                                                                                                                                                                                                                                                                                                                                                                                                                                                                                                                                                                                                                | Data source                                  | Schedule          |
|------------------------------------------------------------|--------------------------------------------------------------------------------------------|------------------------------------------------------------------------------------------------------------------------------------------------------------------------------------------------------------------------------------------------------------------------------------------------------------------------------------------------------------------------------------------------------------------------------------------------------------------------------------------------------------------------------------------------------------------------------------------------------------------------------------------------------------------------------------------------------------------------------------------------------------------------------------------------------------------------------------------------------------------------------------------------------------------------------------------------------------------------------------------------------------------------------------------------------------------------------------------------------------------------------------------------------------------------------------------------------------------------------------------------------------------------------------------------------------------------------------------------------------------------------------------------------------------------------------------------------------------------------------------------------------------------------------------------------------------------------------------------------------------------------------------------------------------------------------------------------------------------------------------------------------------------------------------------------------------------------------------------------------------------------------------------------------------------------------------------|----------------------------------------------|-------------------|
| Improved clinical service delivery according to guidelines | To what extent does the program improve clinical service delivery according to guidelines? | <p>Measures relating to diabetes annual cycle of care. Process outcomes:</p> <ul style="list-style-type: none"> <li>- proportion of patient population with HbA<sub>1c</sub> tests completed</li> <li>- proportion of patient population with foot exams completed</li> <li>- proportion of patient population with eye examinations completed</li> <li>- proportion of patient population with blood pressure recorded</li> <li>- proportion of patient population with lipids tests completed</li> <li>- proportion of patient population with microalbuminuria tests completed</li> <li>- proportion of patient population with vaccinations completed in accordance with schedule</li> <li>- proportion of patients with smoking status recorded.</li> </ul> <p>Clinical outcomes:</p> <ul style="list-style-type: none"> <li>- proportion of patient population with HbA<sub>1c</sub> ≤7%</li> <li>- proportion of patient population with blood pressure &lt;130/80</li> <li>- proportion of patient population with total cholesterol &lt;4mmol/L</li> <li>- proportion of patient population with LDL cholesterol &lt;2mmol/L</li> <li>- proportion of patient population with microalbuminuria &lt;2.5/3.5 mg/mmol (men/women)</li> </ul> <hr/> <p>Measures relating to chronic obstructive pulmonary disease. Process outcomes:</p> <ul style="list-style-type: none"> <li>- proportion of population with spirometry completed</li> <li>- proportions of patient population with vaccinations completed in accordance with schedule</li> <li>- proportion of patients with smoking status recorded</li> <li>- proportion of patient population with vaccinations completed in accordance with schedule</li> <li>- proportion of patients with smoking status recorded.</li> </ul> <p>Clinical outcomes:</p> <ul style="list-style-type: none"> <li>- proportion of patient population with current influenza vaccination</li> </ul> | GPr & GCIC data (Shared Care Record, Pencat) | 3 month intervals |

| Objective | Research question | Outcome measure                                                                                                                                                                                                                                                                                                                                                                                                                                                                                                                                                                                                                                        | Data source | Schedule |
|-----------|-------------------|--------------------------------------------------------------------------------------------------------------------------------------------------------------------------------------------------------------------------------------------------------------------------------------------------------------------------------------------------------------------------------------------------------------------------------------------------------------------------------------------------------------------------------------------------------------------------------------------------------------------------------------------------------|-------------|----------|
|           |                   | <ul style="list-style-type: none"> <li>- proportions of patient population with current pneumococcal vaccination</li> <li>- proportion of patients whom are non-smokers.</li> </ul>                                                                                                                                                                                                                                                                                                                                                                                                                                                                    |             |          |
|           |                   | <hr/> <p>Measures relating to chronic kidney disease best practice guidelines. Process outcomes:</p> <ul style="list-style-type: none"> <li>- proportion of patient population with blood pressure recorded</li> <li>- proportion of patient population with eGFR recorded</li> <li>- proportion of patients with ARB or ACE medication prescribed</li> <li>- proportion of population with ACR recorded</li> <li>- proportion of patient population with lipids tested</li> <li>- proportion of patient population with vaccinations completed in accordance with schedule</li> <li>- proportion of patients with smoking status recorded.</li> </ul> |             |          |
|           |                   | <p>Clinical outcomes:</p> <ul style="list-style-type: none"> <li>- proportion of patient population with blood pressure <math>\leq 140/90</math> mmHg</li> <li>- proportion of patient population with lipids <math>&lt; 4.0</math> mmol/L total, <math>&lt; 2.5</math> mmol/L LDL</li> </ul>                                                                                                                                                                                                                                                                                                                                                          |             |          |
|           |                   | <hr/> <p>Measures relating to heart disease best practice guidelines. Process outcomes:</p> <ul style="list-style-type: none"> <li>- proportion of patient population with lipid lowering medication prescribed</li> <li>- proportion of patient population with anti-hypertensive medication prescribed</li> <li>- proportion of patient population with blood pressure recorded</li> <li>- proportion of patient population with lipids tested</li> <li>- proportion of patient population with vaccinations completed in accordance with schedule</li> <li>- proportion of patients with smoking status recorded.</li> </ul>                        |             |          |
|           |                   | <p>Clinical outcomes:</p> <ul style="list-style-type: none"> <li>- proportion of patient population with blood pressure <math>\leq 140/90</math></li> <li>- proportion of patient population with LDL cholesterol <math>&lt; 2</math> mmol/L</li> </ul>                                                                                                                                                                                                                                                                                                                                                                                                |             |          |
|           |                   | <hr/> <p>Measures relating to service delivery (process outcomes):</p>                                                                                                                                                                                                                                                                                                                                                                                                                                                                                                                                                                                 |             |          |

| Objective                              | Research question                                                                                                                                                                                                  | Outcome measure                                                                                                                                                                                                                                                                                                                                                                                                                                                                                                                                                                                                                                                                                                                                                                                                                                                                                                                                                                                                                                                                                         | Data source                                                                                                                                                                                                                                                                                                           | Schedule               |
|----------------------------------------|--------------------------------------------------------------------------------------------------------------------------------------------------------------------------------------------------------------------|---------------------------------------------------------------------------------------------------------------------------------------------------------------------------------------------------------------------------------------------------------------------------------------------------------------------------------------------------------------------------------------------------------------------------------------------------------------------------------------------------------------------------------------------------------------------------------------------------------------------------------------------------------------------------------------------------------------------------------------------------------------------------------------------------------------------------------------------------------------------------------------------------------------------------------------------------------------------------------------------------------------------------------------------------------------------------------------------------------|-----------------------------------------------------------------------------------------------------------------------------------------------------------------------------------------------------------------------------------------------------------------------------------------------------------------------|------------------------|
|                                        |                                                                                                                                                                                                                    | <ul style="list-style-type: none"> <li>- number of GP management plans and reviews</li> <li>- number of Team Care Arrangements and reviews</li> </ul>                                                                                                                                                                                                                                                                                                                                                                                                                                                                                                                                                                                                                                                                                                                                                                                                                                                                                                                                                   |                                                                                                                                                                                                                                                                                                                       |                        |
|                                        |                                                                                                                                                                                                                    | Assessment of chronic illness care (ACIC-28) (intervention group only)                                                                                                                                                                                                                                                                                                                                                                                                                                                                                                                                                                                                                                                                                                                                                                                                                                                                                                                                                                                                                                  | GP surveys                                                                                                                                                                                                                                                                                                            | Sept 2015 and Dec 2018 |
| To examine implementation fidelity     | <p>1. To what extent was the program implemented as intended?</p> <p>2. How successfully were the strategies of the program implemented and conducted as planned?</p>                                              | <p>Completion of risk stratification of patients:</p> <ul style="list-style-type: none"> <li>- method of patient identification (collaboration with GP, algorithm tool).</li> </ul> <p>Holistic assessments:</p> <ul style="list-style-type: none"> <li>- number completed</li> <li>- model of holistic assessment (incl. completed by whom)</li> <li>- type of risk assessment tools completed.</li> </ul>                                                                                                                                                                                                                                                                                                                                                                                                                                                                                                                                                                                                                                                                                             | <ul style="list-style-type: none"> <li>- risk stratification point criteria</li> <li>- review of GCIC protocols and manuals</li> <li>- holistic assessment monitoring database (daily reports)</li> <li>- GCIC quality audits</li> </ul>                                                                              |                        |
| To examine implementation determinants | <p>1. What were the factors that facilitated and / or impeded program implementation?</p> <p>2. Which elements of the program were seen to be most useful by staff and patients which contributed to outcomes?</p> | <p>Risk stratification:</p> <ul style="list-style-type: none"> <li>- number of patients identified</li> <li>- patient characteristics (incl. demographics).</li> </ul> <p>Services accessed:</p> <ul style="list-style-type: none"> <li>- number and type of services used e.g., allied health, home care, brokered services, hospital services.</li> </ul> <p>Holistic assessment outputs:</p> <ul style="list-style-type: none"> <li>- number of patient goals created</li> <li>- number of referrals</li> <li>- number of actions</li> <li>- number of live care plans.</li> </ul> <p>Shared Care Record:</p> <ul style="list-style-type: none"> <li>- number and type of consumer views on acceptability, usefulness, efficiency (client, GP, specialist).</li> </ul> <p>Disease registries:</p> <ul style="list-style-type: none"> <li>- number of disease registries implemented in GPs</li> <li>- number of patients on disease registry.</li> </ul> <p>Governance arrangements:</p> <ul style="list-style-type: none"> <li>- leadership stability</li> <li>- organisational capacity</li> </ul> | <ul style="list-style-type: none"> <li>- administrative records</li> <li>- daily reports</li> <li>- holistic assessment monitoring database (daily reports)</li> <li>- staff focus groups</li> <li>- staff surveys and diaries</li> <li>- administrative data for use of components (revealed preferences)</li> </ul> |                        |

| Objective                   | Research question                                           | Outcome measure                                                                                                                                                                                                                                                                                                                                                                                                                                                                                                       | Data source   | Schedule                                                 |
|-----------------------------|-------------------------------------------------------------|-----------------------------------------------------------------------------------------------------------------------------------------------------------------------------------------------------------------------------------------------------------------------------------------------------------------------------------------------------------------------------------------------------------------------------------------------------------------------------------------------------------------------|---------------|----------------------------------------------------------|
|                             |                                                             | <ul style="list-style-type: none"> <li>- adequacy of infrastructure, staff arrangement, partnerships, resources.</li> <li>Change management strategies</li> <li>Staff and skills training:               <ul style="list-style-type: none"> <li>- GCIC staff</li> <li>- GPr staff</li> <li>- other care providers.</li> </ul> </li> <li>Program reach:               <ul style="list-style-type: none"> <li>- numbers and timeframe of GPr on-boarding</li> <li>- number of patients enrolled.</li> </ul> </li> </ul> |               |                                                          |
| Improved continuity of care | To what extent does the program improve continuity of care? | ACIC survey on management of chronic conditions in relation to the chronic disease model (network GPrs only)                                                                                                                                                                                                                                                                                                                                                                                                          | questionnaire | baseline and at program completion                       |
|                             |                                                             | Patients perspectives on continuity and coordination of care (qualitative method)                                                                                                                                                                                                                                                                                                                                                                                                                                     | Focus Groups  | 2016 and 2017 (intervention group), 2017 (control group) |

*GCHHS = Gold Coast Hospital and Health Service; GCIC = Gold Coast Integrated Care; MBS = Medicare Benefits Schedule; PBS = Pharmaceutical Benefits Scheme; AR-DRG = Australian Refined Diagnosis Related Groups; AQOL-4D = Assessment of Quality of Life questionnaire; ICECAP-O-5 = Index of Capability for older people; LSNS-6 = Lubben Social Network Scale; GP = general practitioner; GPr = general practice; Pencat = Classic Clinical Audit Tool; SAPS-7 = Short Assessment of Patient Satisfaction questionnaire; PACIC-20 = Patient-Assessed Chronic Illness Care questionnaire; HbA<sub>1c</sub> = glycated haemoglobin; LDL = low-density lipoprotein; eGFR = estimated glomerular filtration rate; ARB = angiotensin II receptor blocker; ACE = angiotensin converting enzyme; ACR = albumin-to-creatinine ratio; ACIC-28 = Assessment of Chronic Illness Care; <sup>a</sup> out of pocket costs are reported for MBS/PBS data only, and calculations exclude private health insurance, travel costs, loss of income and other non-healthcare costs;*
